# Supplementary material for: A Functional Survey of the Regulatory Landscape of Estrogen Receptor–Positive Breast Cancer Evolution
Source: PubMed Central journal article supplement — Cancer Discov. 2024 May 16;14(9):1612–30. doi: 10.1158/2159-8290.CD-23-1157 (PMC11372371; doi:10.1158/2159-8290.cd-23-1157), 2024-05-16
Supplement: cd-23-1157_supplementary_figure_s2_suppsf2.pdf [file cd-23-1157_supplementary_figure_s2_suppsf2.pdf]

# Supplementary Figure S2

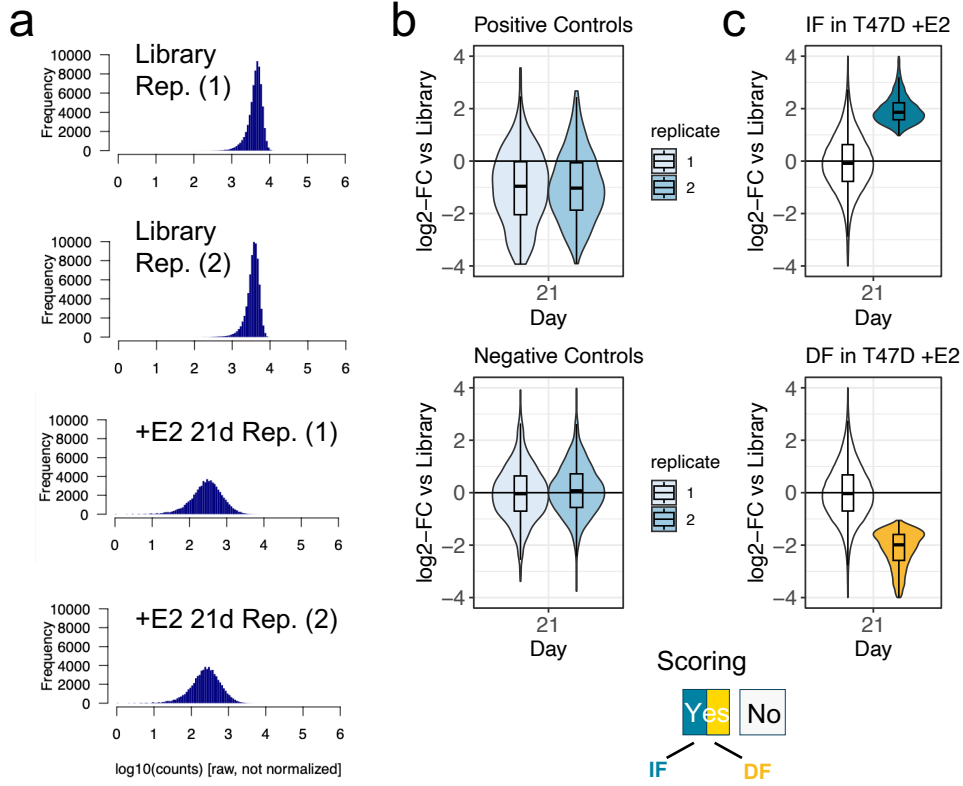

**Supplementary Figure 2. SIDP identifies Cis Regulatory regions in T47D with high reproducibility.** (a) Histograms showing the distribution of counts per sgRNAs ( $\log_{10}$ ) for two replicates of sgRNAs in pool 1, at day 0 (library) and day 21 post-infection (T47D +E2). (b) Box plots overlaid on violin plots showing the  $\log_2$ -fold-change of positive controls (left panel) and non-targeting sgRNAs (right panel) in two replicates of T47D cells, at 21 days, as compared to the initial library. (c) Box plots overlaid to violin plots of  $\log_2$ -fold-change of both scoring (either blue or yellow) and non-scoring (white) sgRNAs at 21 days post-infection in T47D cells (+E2), at 21 days, as compared to the initial library.
