# Supplementary material for: A Functional Survey of the Regulatory Landscape of Estrogen Receptor–Positive Breast Cancer Evolution
Source: PubMed Central journal article supplement — Cancer Discov. 2024 May 16;14(9):1612–30. doi: 10.1158/2159-8290.CD-23-1157 (PMC11372371; doi:10.1158/2159-8290.cd-23-1157), 2024-05-16
Supplement: cd-23-1157_supplementary_figure_s4_suppsf4.pdf [file cd-23-1157_supplementary_figure_s4_suppsf4.pdf]

# Supplementary Figure 4

## a Positive Controls

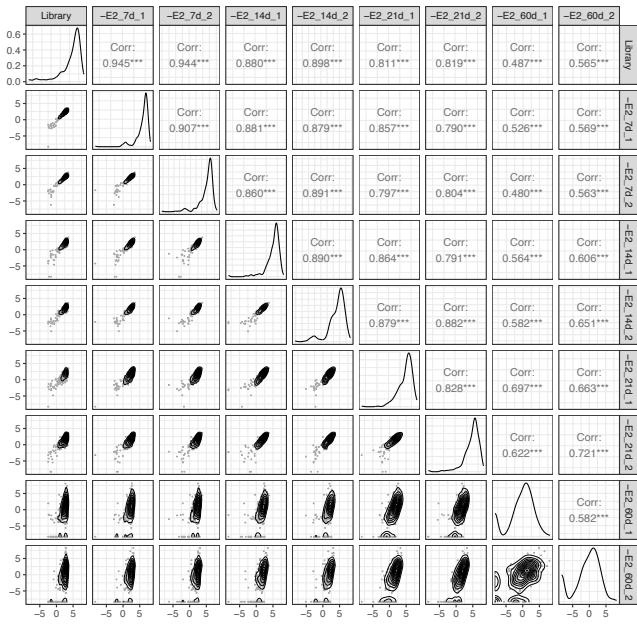

## b Non-Targeting

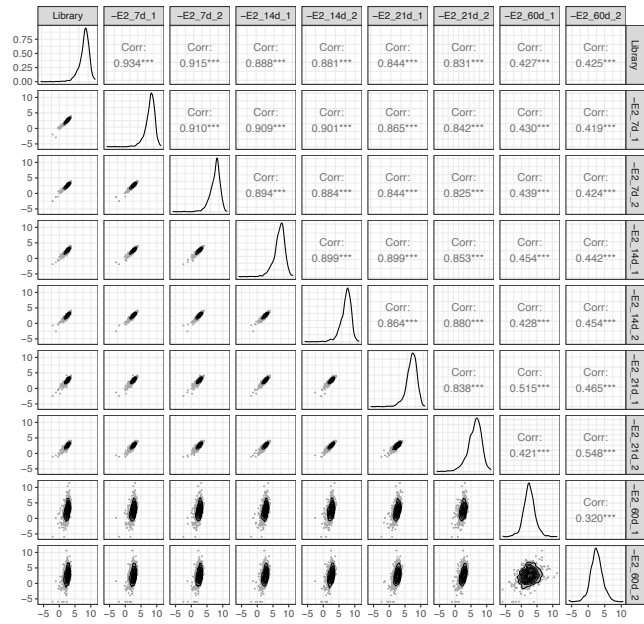

## c Targeting (Significant 21 days)

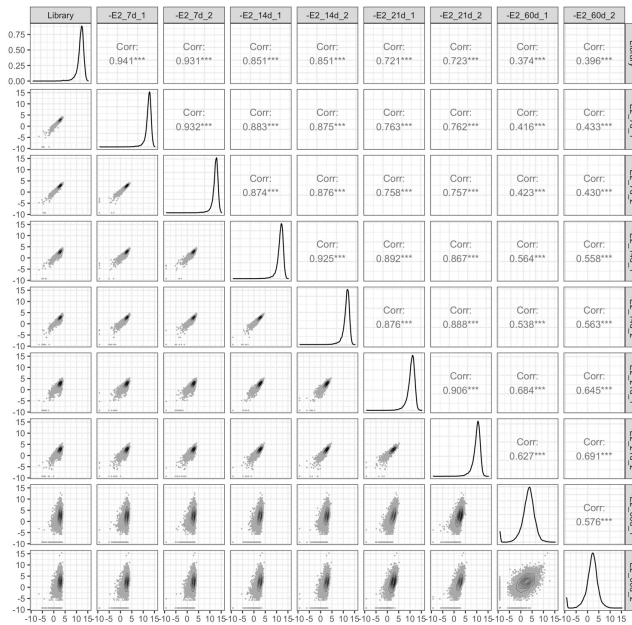

## d Targeting (all)

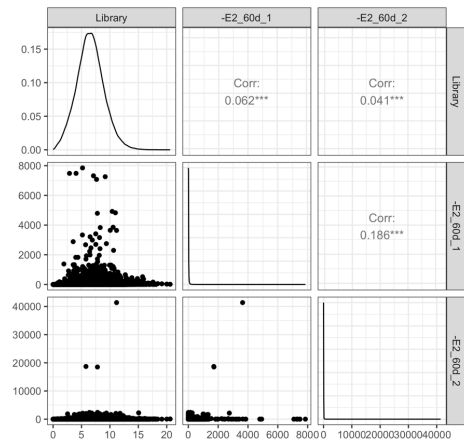

**Supplementary Figure 4. Estrogen deprivation in MCF7 cells introduce stochastic selective pressure in long-term CRISPRi screens.** (a) Correlograms (considering either positive control sgRNAs) between the TMM-normalized, log<sub>2</sub>-transformed counts across replicates (7, 14, 21 and 60 days post-infection; +E2). The initial library is also included. Scatterplots of each pair of samples are drawn on the left part of grid. Pearson correlation is displayed on the right (p-value: \*\*\* < 0.001; \*\* < 0.01; \* < 0.05; . < 0.10). Distribution of values for each sample is shown on the diagonal. (b) Same as (a) but for non-targeting sgRNAs. (c) Same as (a) and (b) but for sgRNAs scoring 21 days post-infection. (d) Same as (c) but considering all targeting sgRNAs (scoring and not-scoring). Only the library and the two 60 days post-infection samples are shown. TMM-normalized, but prior to log<sub>2</sub>-transformation, were used in this case (to highlight outliers).
