# Supplementary material for: A Functional Survey of the Regulatory Landscape of Estrogen Receptor–Positive Breast Cancer Evolution
Source: PubMed Central journal article supplement — Cancer Discov. 2024 May 16;14(9):1612–30. doi: 10.1158/2159-8290.CD-23-1157 (PMC11372371; doi:10.1158/2159-8290.cd-23-1157), 2024-05-16
Supplement: cd-23-1157_supplementary_figure_s7_suppsf7.pdf [file cd-23-1157_supplementary_figure_s7_suppsf7.pdf]

# Supplementary Figure 7

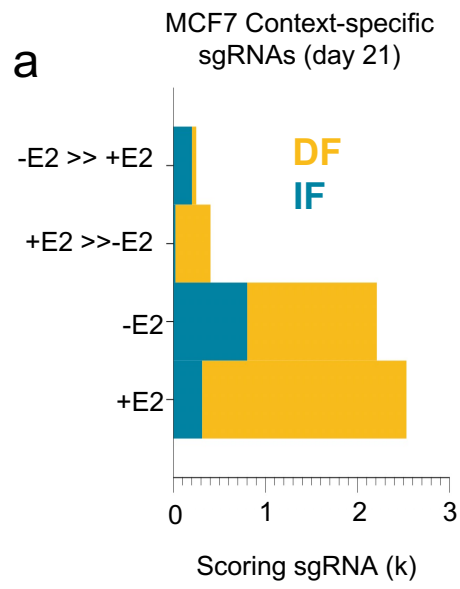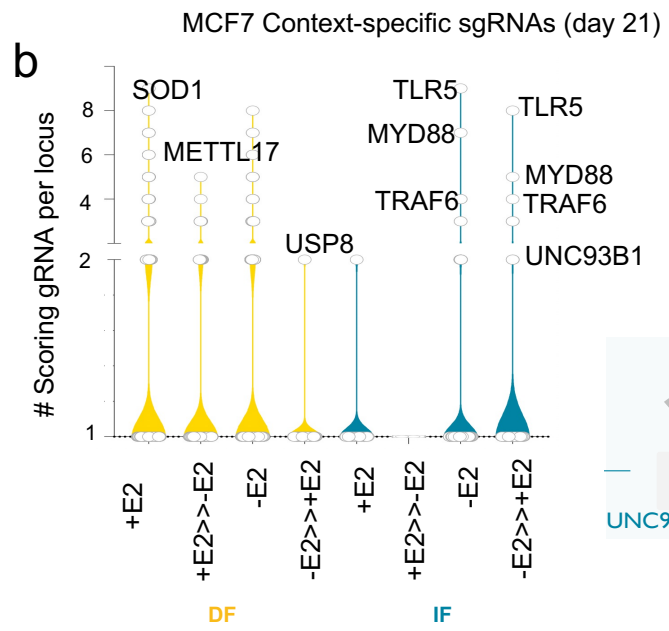

**Supplementary Figure 7. SIDP identifies regulatory regions with context-dependent activity in MCF7 cells.** (a) Bar plot showing the overall number of sgRNAs (k = thousand) showing the indicated behaviour at day 21. (b) Violin plots showing the number of sgRNAs per locus, for the loci significantly decreased or increased frequency at day 21 post-infection (-E2). The nearest gene to the overlapping CRE is indicated for specific outliers. (Bottom right) Schematic showing the genes identified in the TLR/NF- $\kappa$ B signaling pathway (showing at least one CRE with multiple sgRNAs showing increased frequency at day 21 post-infection).
