# Supplementary material for: A Functional Survey of the Regulatory Landscape of Estrogen Receptor–Positive Breast Cancer Evolution
Source: PubMed Central journal article supplement — Cancer Discov. 2024 May 16;14(9):1612–30. doi: 10.1158/2159-8290.CD-23-1157 (PMC11372371; doi:10.1158/2159-8290.cd-23-1157), 2024-05-16
Supplement: cd-23-1157_supplementary_figure_s8_suppsf8.pdf [file cd-23-1157_supplementary_figure_s8_suppsf8.pdf]

# Supplementary Figure 8

**a**

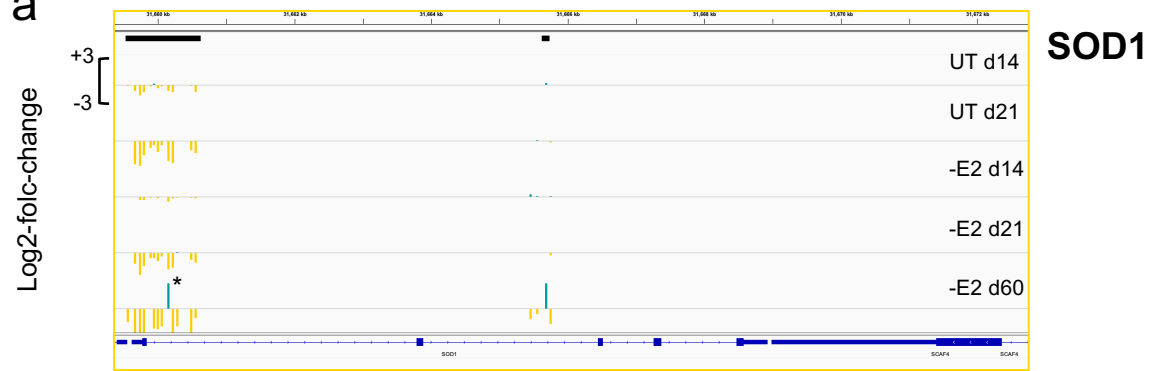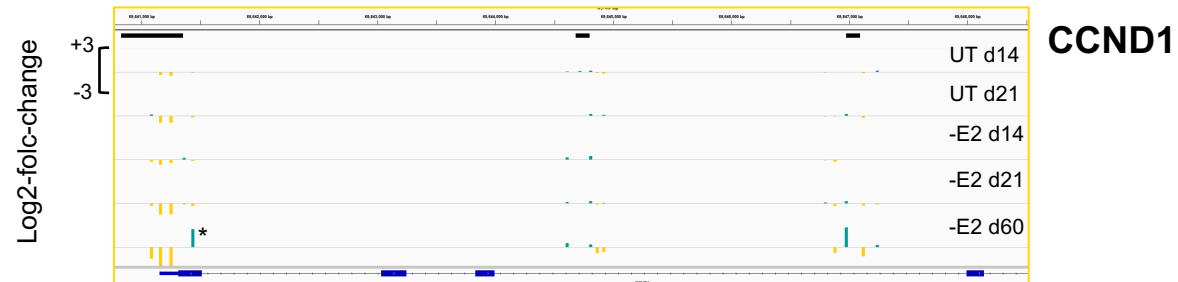

**b**

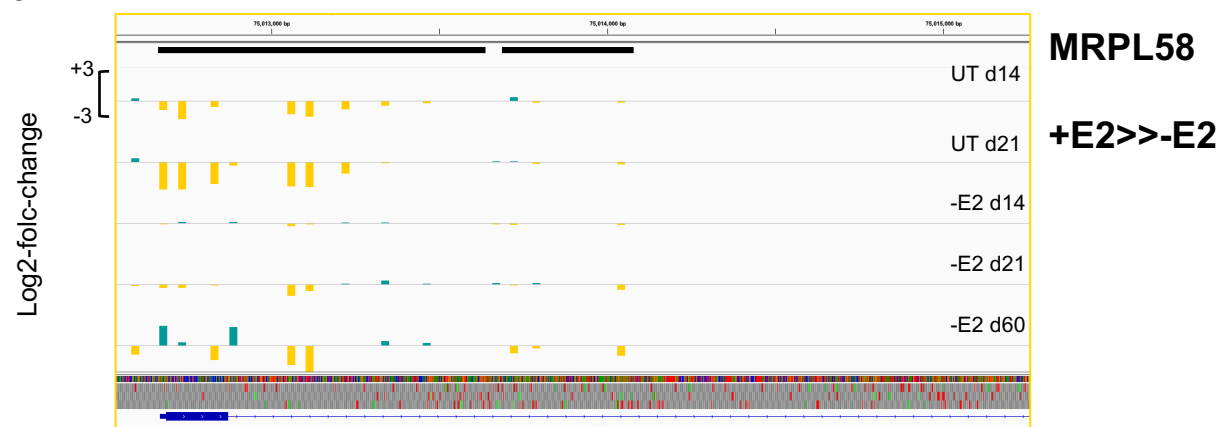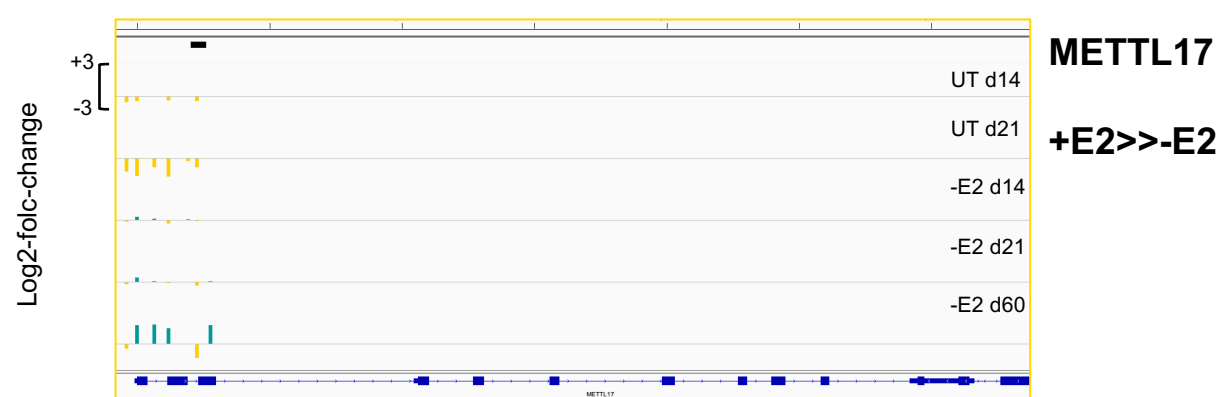

**Supplementary Figure 8. SIDP identifies regulatory regions with context-dependent activity in MCF7 cells.** (a-b) SIDP results at the indicated loci are shown as IGV genome browser screenshots. For each of the indicated condition, the log<sub>2</sub>-fold change for each sgRNA is indicated, with bars proportional to the effect size, and colour reflecting the sign (blue = IF; yellow = DF). The asterisk highlight how stochastic entrance in dormancy can introduce noise in robust DF CREs. Note: y-axis for the tracks is only shown for the first one (range is [-3, +3] for all tracks).
