# Supplementary material for: A Functional Survey of the Regulatory Landscape of Estrogen Receptor–Positive Breast Cancer Evolution
Source: PubMed Central journal article supplement — Cancer Discov. 2024 May 16;14(9):1612–30. doi: 10.1158/2159-8290.CD-23-1157 (PMC11372371; doi:10.1158/2159-8290.cd-23-1157), 2024-05-16
Supplement: cd-23-1157_supplementary_figure_s11_suppsf11.pdf [file cd-23-1157_supplementary_figure_s11_suppsf11.pdf]

# Supplementary Figure 11

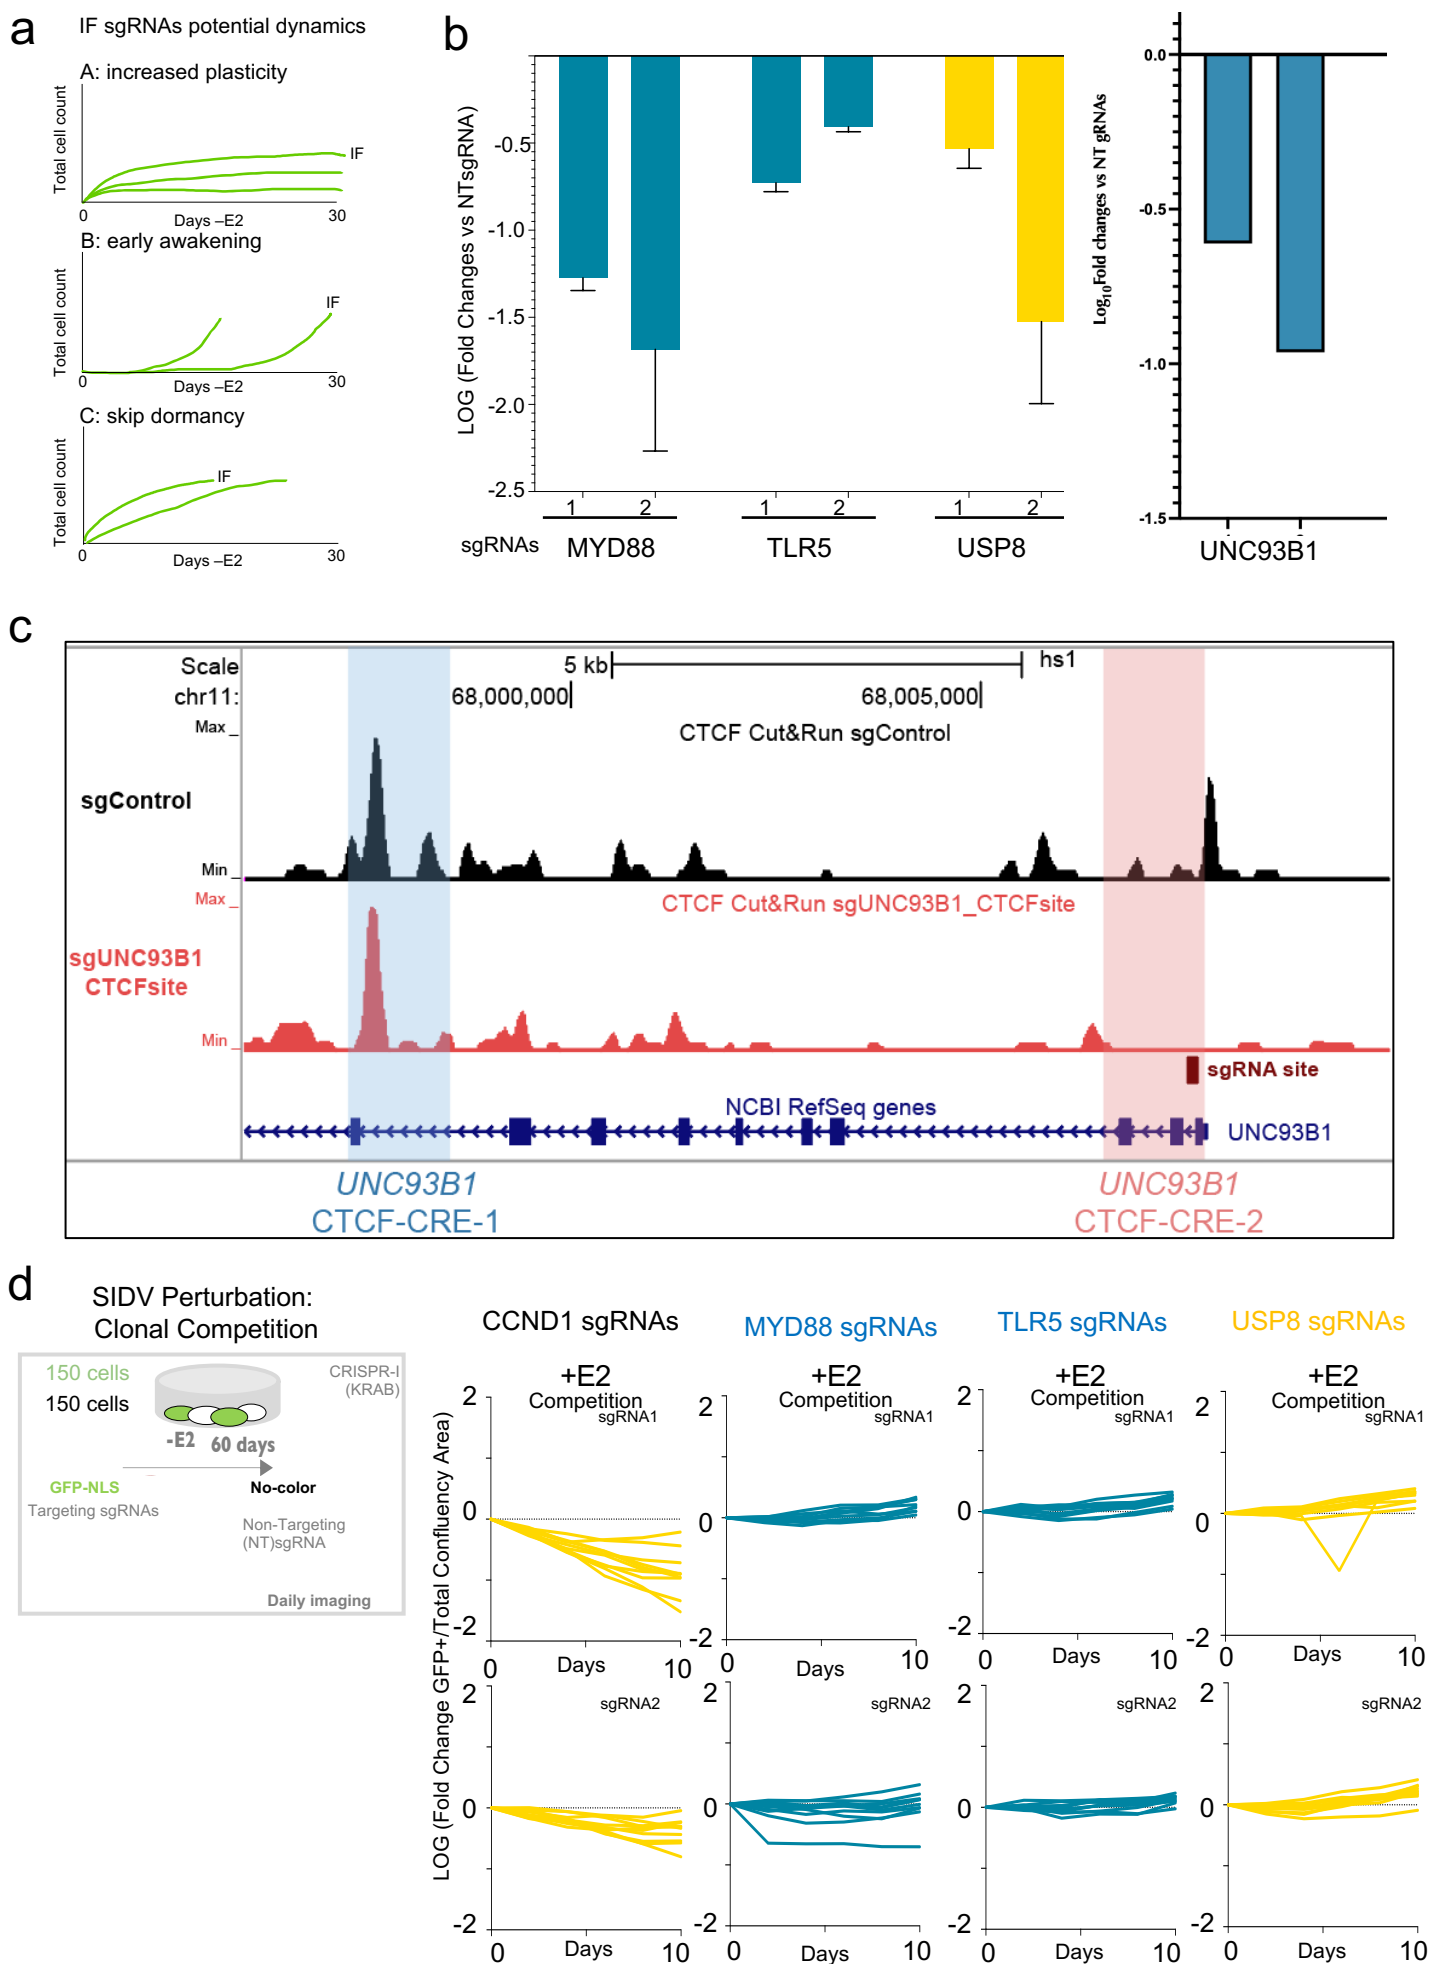

**Supplementary Figure 11. Validation of DF and IF SIDP hits.** (a) Potential models compatible with the observed changes in sgRNA relative frequency for the TLR pathways at day 21 in the -E2 screen. Top: cells a higher proportion of cells carrying the sgRNA can enter dormancy compared to cells carrying other sgRNAs, center: cells carrying the sgRNA engage in early awakening, bottom: cells carrying the sgRNAs maintain a basal proliferative potential while failing to enter a dormant state (b) RT-qPCR validation of the effect of individual sgRNA on MCF7 transfected with a constitutive dCAS(-KRAB construct. Relative mRNA value are plotted against a non-targeting sgRNA. (c) CTCF binding profiles (by Cut&Run) in MCF7-dCas9-cells either expressing a sgRNA targeting the CTCF-binding-sites cluster at one of the two SIDP-targeted CREs of UNC93B1 (CTCF-CRE-2), or a control sgRNA. (d) CCND1 targeting sgRNAs lead to rapid extinction of GFP cells while non-targeted cells enter dormancy with normal dynamics. Green panels: absolute GFP+ count (CCND1 sgRNAs). Yellow panels: normalized ratios GFP/non GFP across time points.
