# Supplementary material for: A Functional Survey of the Regulatory Landscape of Estrogen Receptor–Positive Breast Cancer Evolution
Source: PubMed Central journal article supplement — Cancer Discov. 2024 May 16;14(9):1612–30. doi: 10.1158/2159-8290.CD-23-1157 (PMC11372371; doi:10.1158/2159-8290.cd-23-1157), 2024-05-16
Supplement: cd-23-1157_supplementary_figure_s12_suppsf12.pdf [file cd-23-1157_supplementary_figure_s12_suppsf12.pdf]

# Supplementary Figure 12

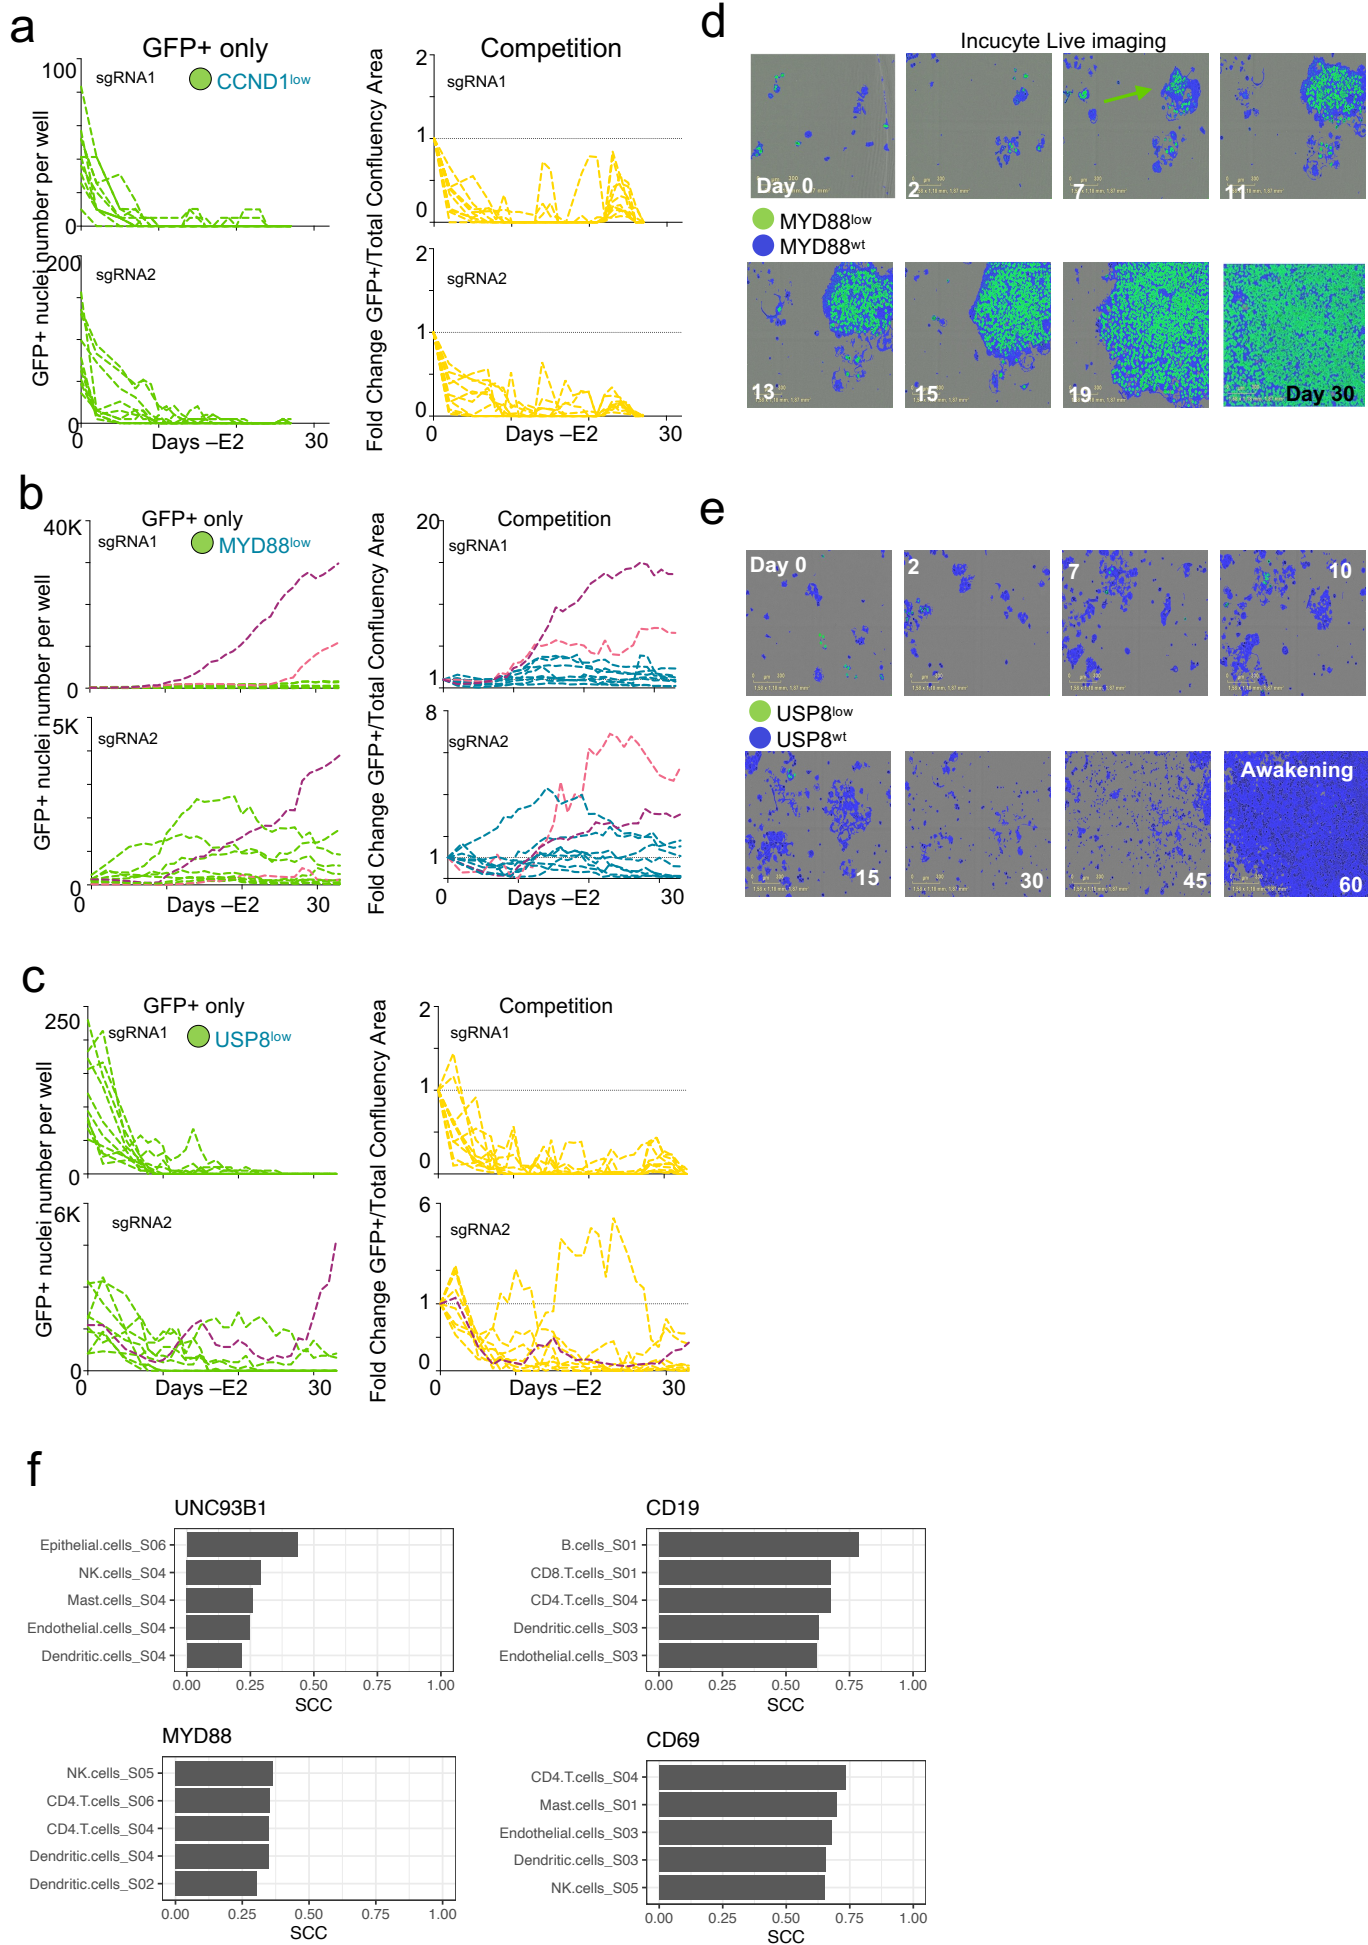

**Supplementary Figure 12. Validation of DF and IF SIDP hits.** (a) Downregulating CCND1 decrease the fitness of MCF7 cells under oestrogen deprivation. Green dashed lines (left panels): absolute GFP+ count. Blue dashed lines (right panels): normalized ratios GFP/non GFP across time points. (b) Down-regulating MYD88 accelerates the awakening dynamics driving individual clones to early awakening. Green dashed lines (left panels): absolute GFP+ count. Blue dashed lines (right panels): normalized ratios GFP/non GFP across time points. Pink and purple lines highlight replicates with early awakening events. (c) Same as (a) but with sgRNAs targeting USP8, which specifically decrease adaptability to E2 deprivation. Green dashed lines (left panels): absolute GFP+ count. Yellow dashed lines (right panels): normalized ratios GFP/non GFP across time points. (d) Representative snapshots of the competition between MCF7-dCas9-KRAB cells carrying MYD88 targeting sgRNA (green) vs. cells carrying non-targeting sgRNA (blue) throughout dormancy entrance (30 days of continuous E2 deprivation). (e) Same as (d) but targeting USP8. (f) Bar plots showing the correlation (Spearman's Correlation Coefficient; SCC) between the estimated abundance of the indicated populations (TCGA ER-positive, HER2-negative breast cancer samples, deconvolved using EcoTyper) and the normalised expression of the indicated markers.
