# Supplementary material for: A Functional Survey of the Regulatory Landscape of Estrogen Receptor–Positive Breast Cancer Evolution
Source: PubMed Central journal article supplement — Cancer Discov. 2024 May 16;14(9):1612–30. doi: 10.1158/2159-8290.CD-23-1157 (PMC11372371; doi:10.1158/2159-8290.cd-23-1157), 2024-05-16
Supplement: cd-23-1157_supplementary_figure_s13_suppsf13.pdf [file cd-23-1157_supplementary_figure_s13_suppsf13.pdf]

# Supplementary Figure 13

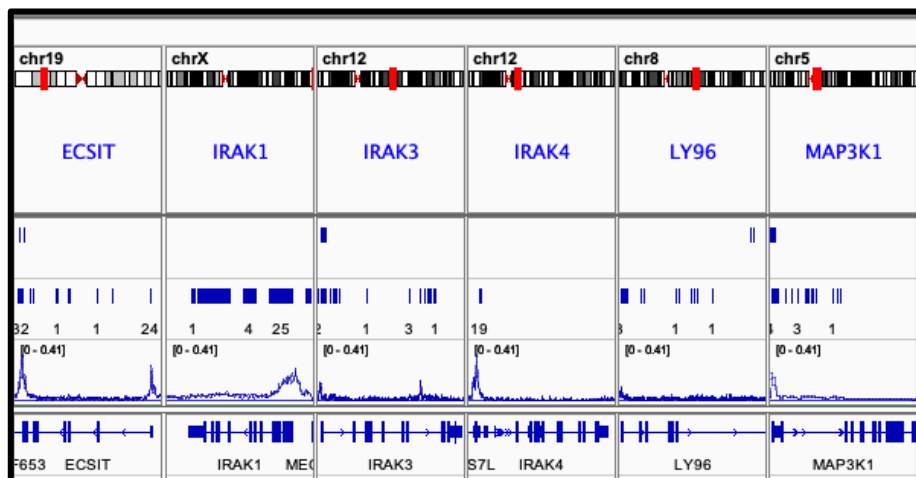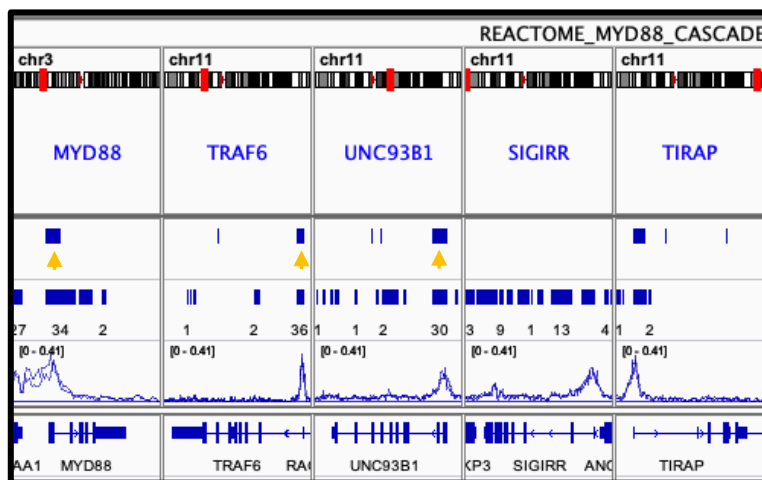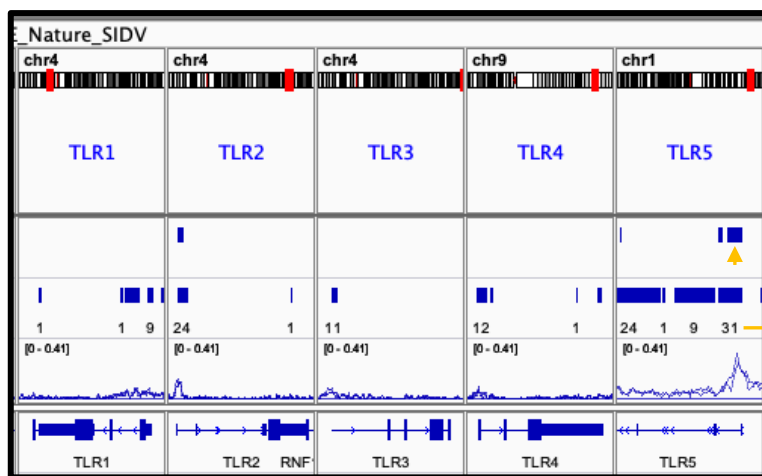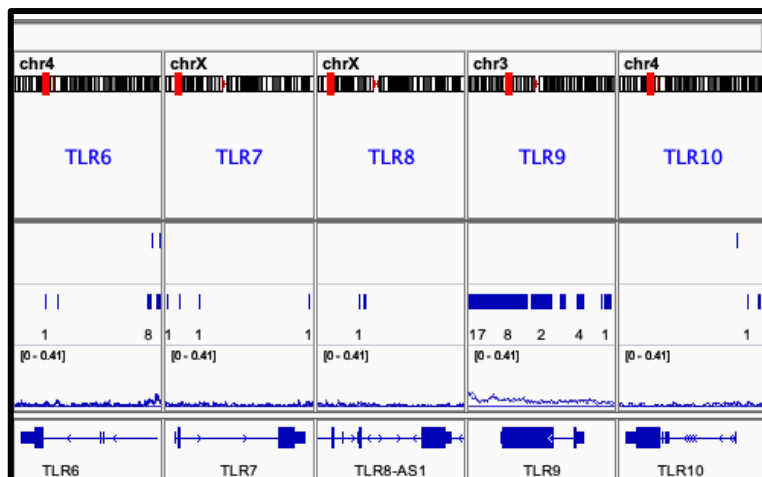

**Supplementary Figure 13. The promoters of genes belonging to the TLR5 cascade are active in ER+ breast cancer patients.** IGV screenshot at loci of genes annotated in the MYD88 signaling cascade (Reactome), showing a summary of the H3K27ac signals across primary and metastatic samples from Patten, Corleone et al. 2018 (Nature Medicine), along with the SID-targeted CREs in the region.
