# Supplementary material for: A Functional Survey of the Regulatory Landscape of Estrogen Receptor–Positive Breast Cancer Evolution
Source: PubMed Central journal article supplement — Cancer Discov. 2024 May 16;14(9):1612–30. doi: 10.1158/2159-8290.CD-23-1157 (PMC11372371; doi:10.1158/2159-8290.cd-23-1157), 2024-05-16
Supplement: cd-23-1157_supplementary_figure_s14_suppsf14.pdf [file cd-23-1157_supplementary_figure_s14_suppsf14.pdf]

# Supplementary Figure 14

a

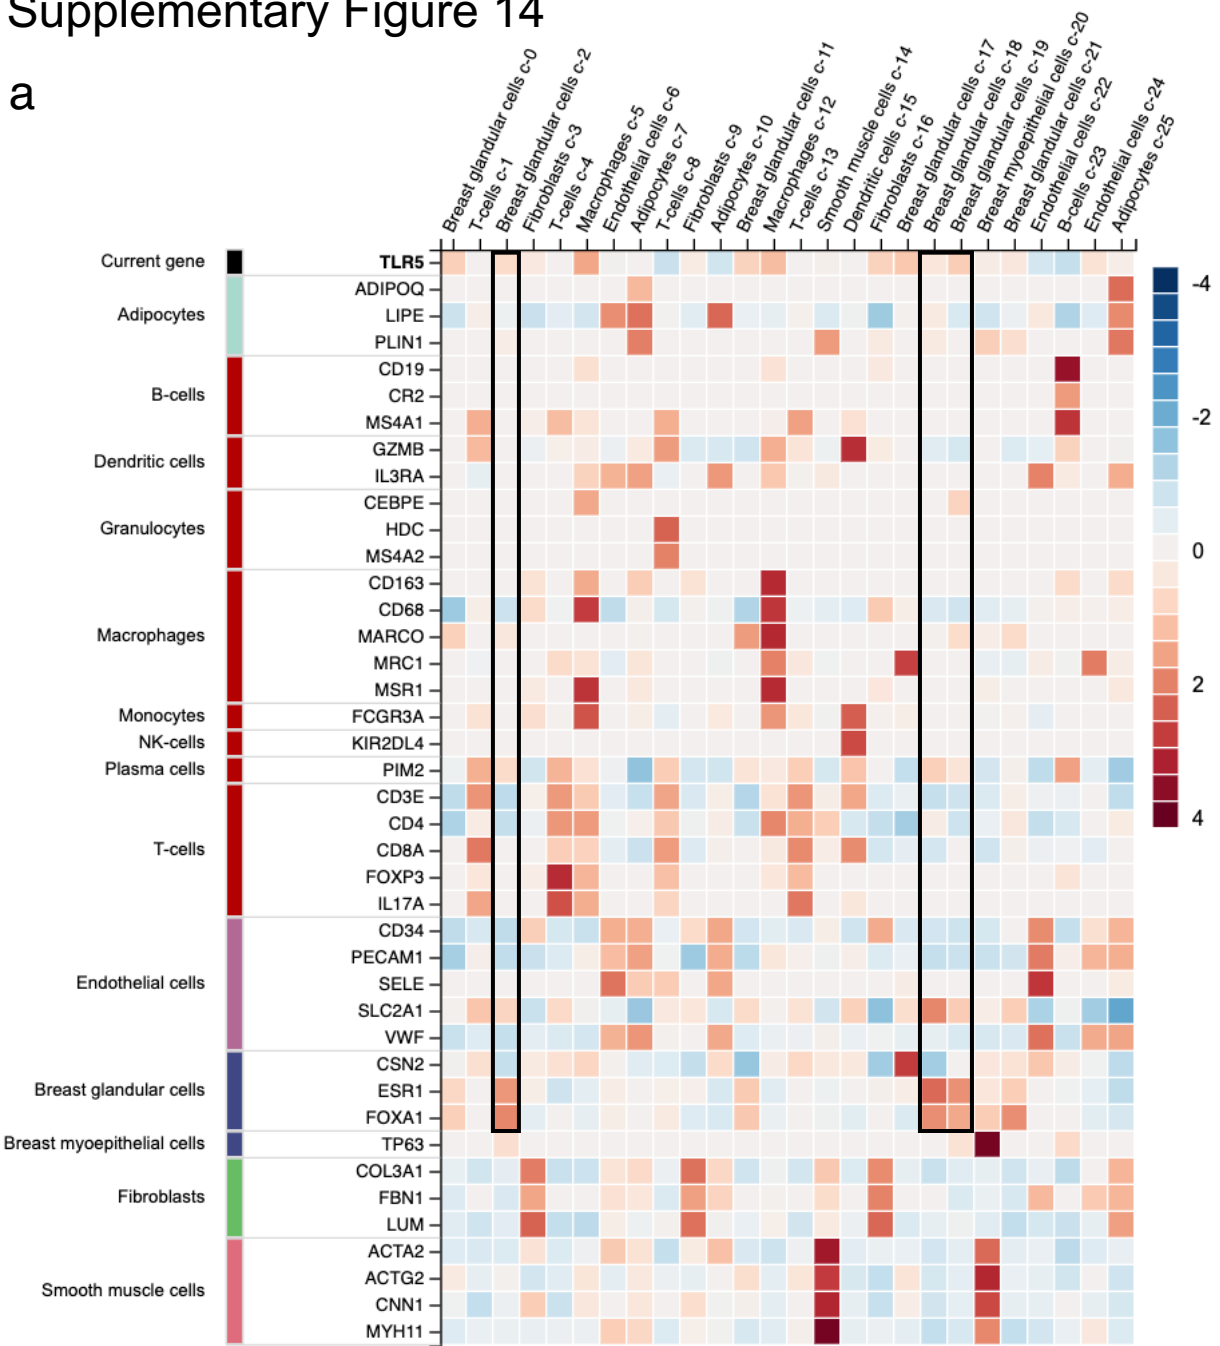

b

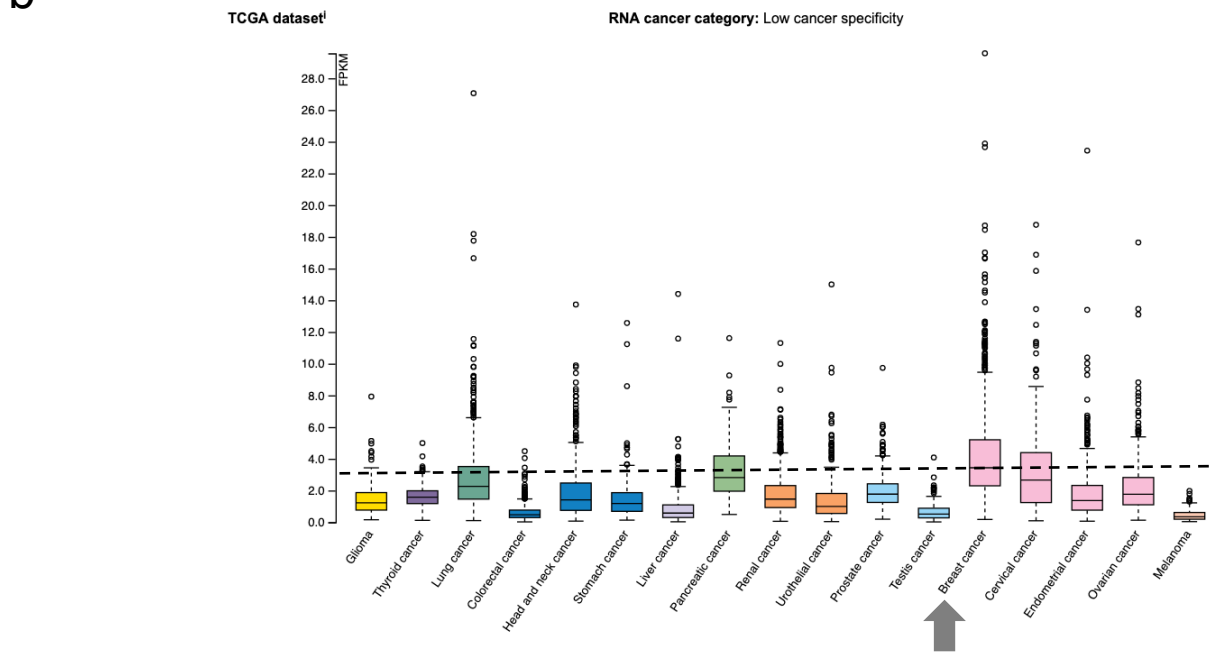

**Supplementary Figure 14. TLR5 expression in ER+ cells from normal and cancer samples.**

(a) Meta-analysis of published scRNA-seq experiments. The heat map shows the relative level of expression of the indicated genes (rows; gene of interest: TLR5; and marker of indicated cell types) across different populations. (b) Box plots showing the normalized expression values of the TLR5 gene across different cancer types, in bulk-RNA-seq samples from the TCGA.
