# Supplementary material for: A Functional Survey of the Regulatory Landscape of Estrogen Receptor–Positive Breast Cancer Evolution
Source: PubMed Central journal article supplement — Cancer Discov. 2024 May 16;14(9):1612–30. doi: 10.1158/2159-8290.CD-23-1157 (PMC11372371; doi:10.1158/2159-8290.cd-23-1157), 2024-05-16
Supplement: cd-23-1157_supplementary_figure_s15_suppsf15.pdf [file cd-23-1157_supplementary_figure_s15_suppsf15.pdf]

# Supplementary Figure 15

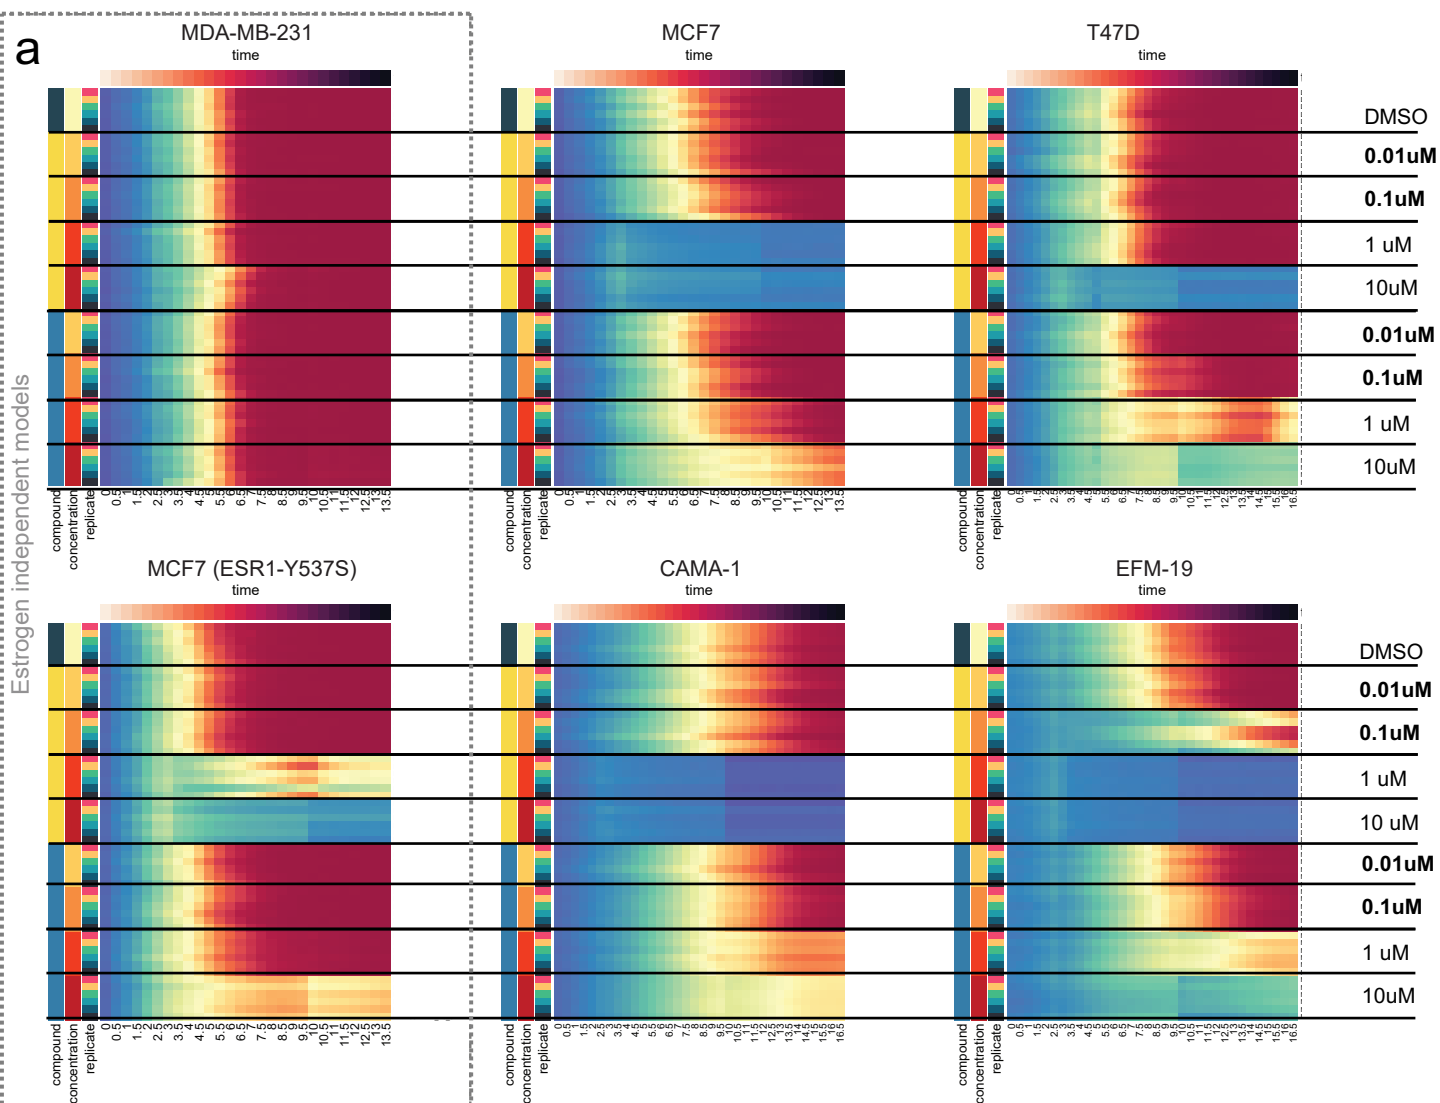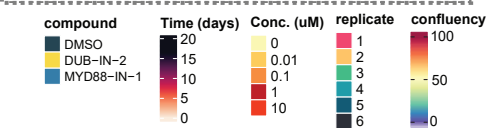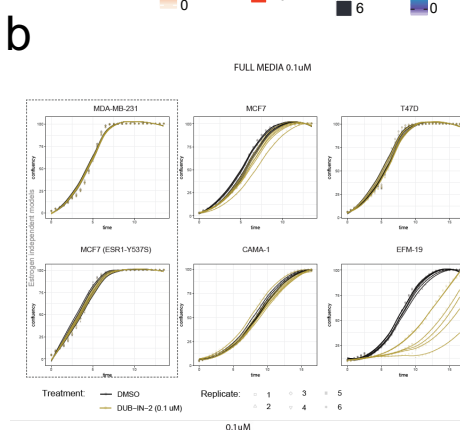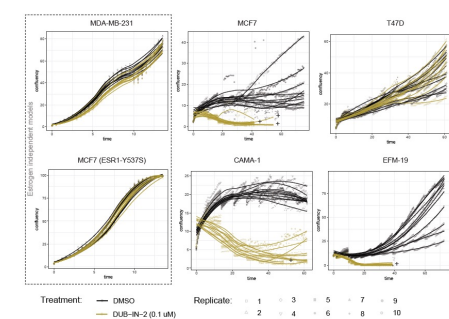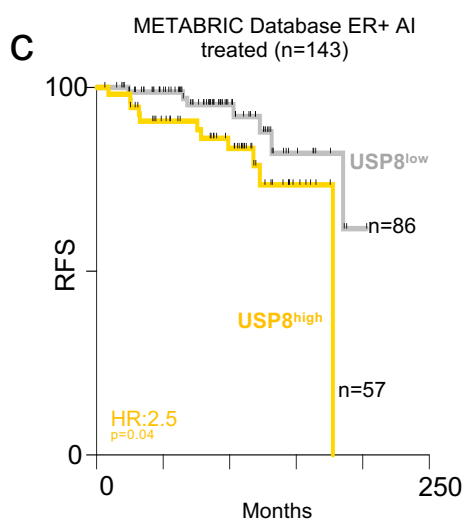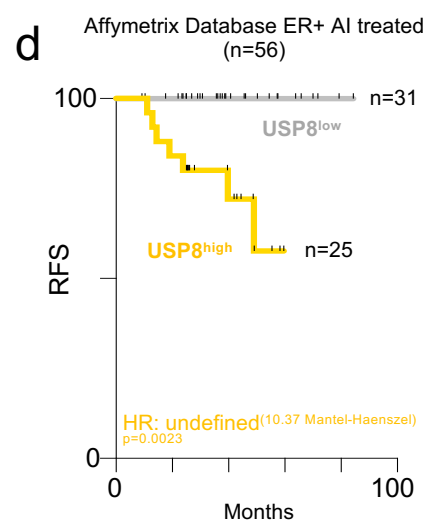

**Supplementary Figure S15. Validation of SIDP via chemical perturbation.** (a) Heatmaps show the confluency of six breast cancer cell lines in response to USP8 (DUB-IN-2, yellow) and MYD88 (MYD88-IN-1, blue) perturbation. We tested five concentrations using live imaging in media containing oestrogen (full media). Lower concentrations (0.01 and 0.1  $\mu\text{M}$ ) very limited impact on cell viability in estradiol supplemented cells. (b) Left: Individual line plots show the impact of low doses DUB-IN-2 (0.1 $\mu\text{M}$ ) on the proliferation of six independent breast cancer cell lines. Right: Individual line plots show the impact of low doses DUB-IN-2 (0.1 $\mu\text{M}$ ) on the proliferation of six independent breast cancer cell lines when combined with oestrogen deprivation. (c-d) Retrospective AI-treated patient stratification based on RNA expression of USP8 (pre-treatment; yellow = USP8-high). RFS=recurrence free survival. Log-rank p-values calculated with a Mantel-Cox Test.
