# Supplementary material for: A Functional Survey of the Regulatory Landscape of Estrogen Receptor–Positive Breast Cancer Evolution
Source: PubMed Central journal article supplement — Cancer Discov. 2024 May 16;14(9):1612–30. doi: 10.1158/2159-8290.CD-23-1157 (PMC11372371; doi:10.1158/2159-8290.cd-23-1157), 2024-05-16
Supplement: cd-23-1157_supplementary_figure_s16_suppsf16.pdf [file cd-23-1157_supplementary_figure_s16_suppsf16.pdf]

# Supplementary Figure 16

**a**

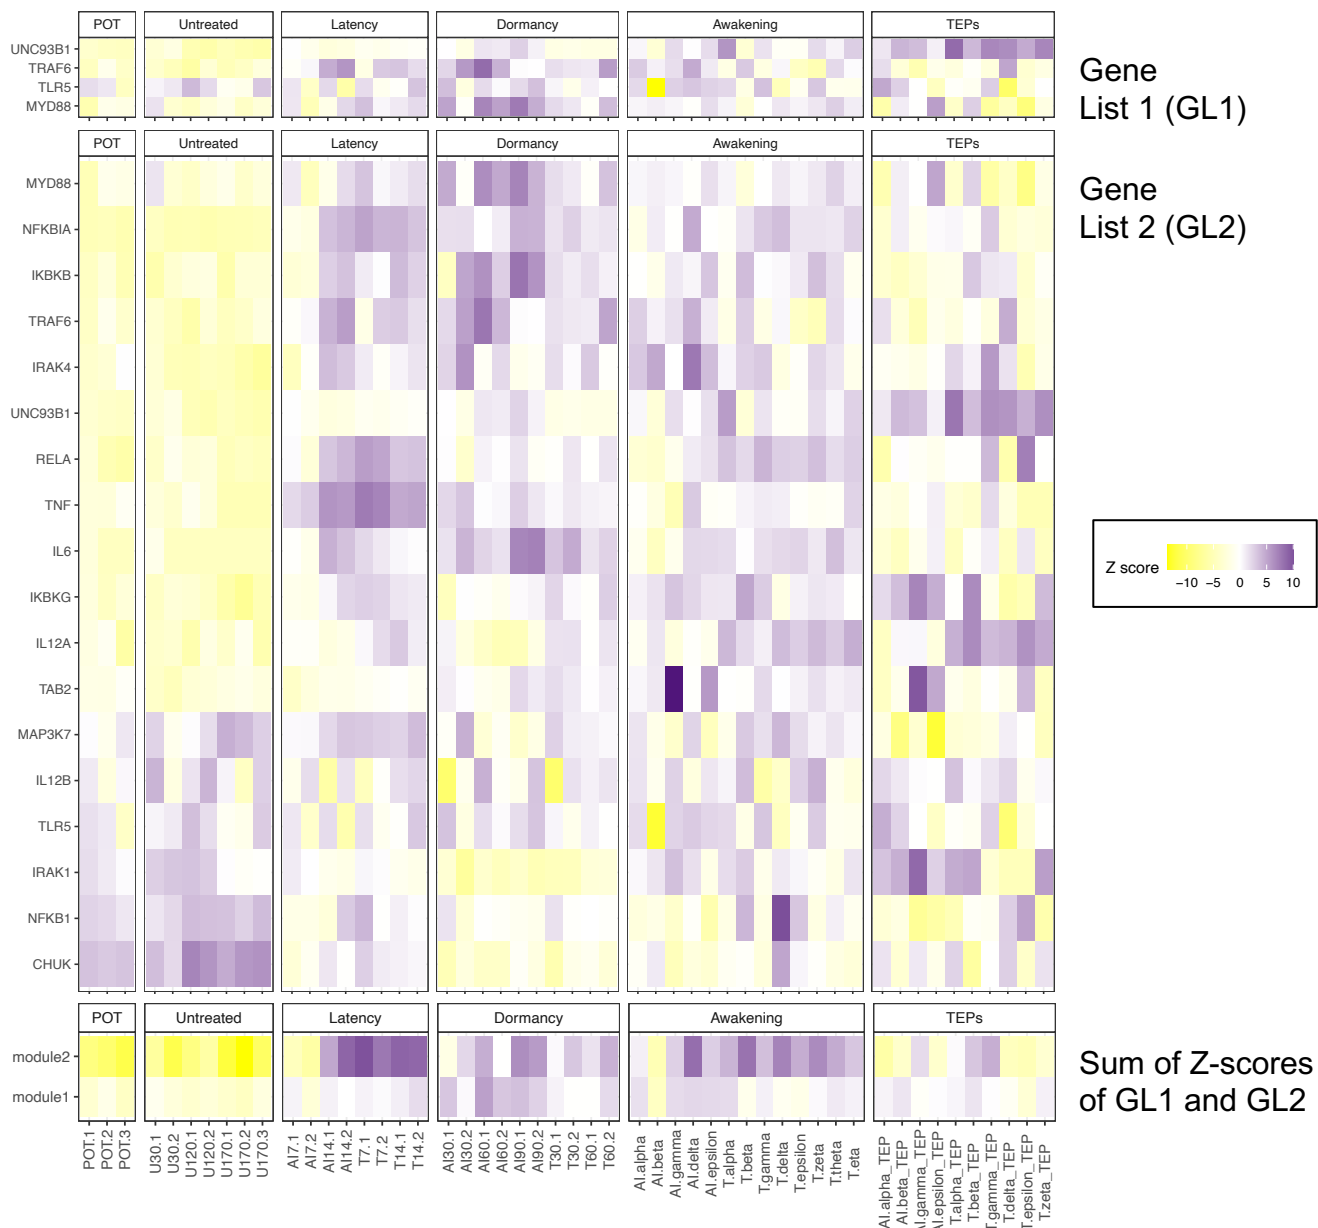

**b**

Module scores for list 1

Module scores for list 2

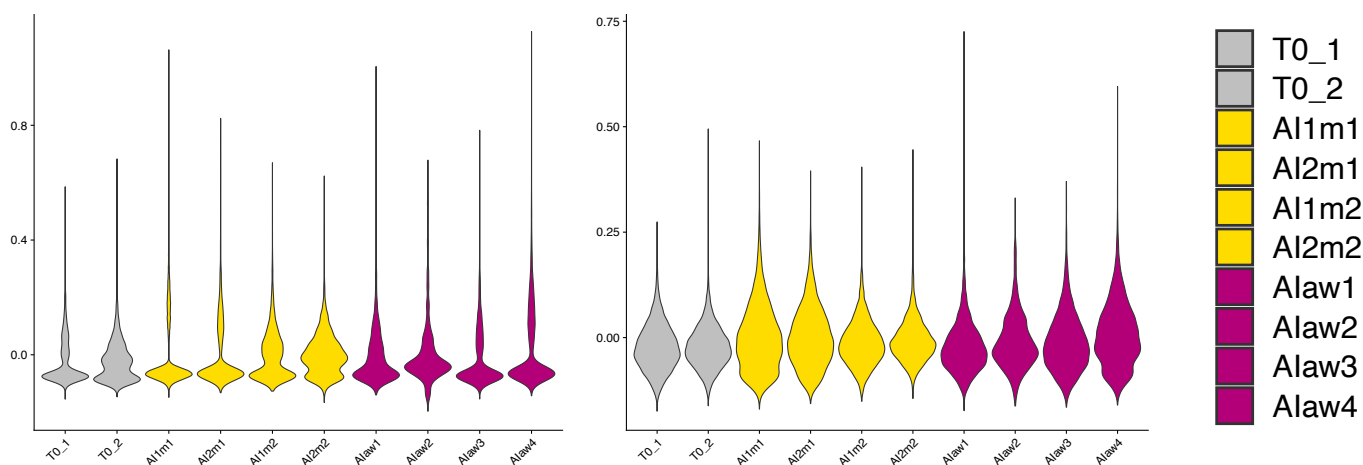

**Supplementary Figure 16. Genes involved in TLR signaling are upregulated in MCF7 during therapy induced dormancy.** (a) Heat map summarizing the expression of genes involved TLR/NF- $\kappa$ B signaling in the TRADITIOM bulk-RNA-seq experiments. (b) Same as (a) but for scRNA-seq, shown as violin plots summarizing the expression values across thousand of single-cells per condition.
